# Supplementary material for: Regulation of dynamic pigment cell states at single-cell resolution
Source: PubMed Central journal article supplement (PMC7455242; doi:10.7554/elife.60388), 2020-08-19
Supplement: elife-60388-transrepform.pdf [file elife-60388-transrepform.pdf]

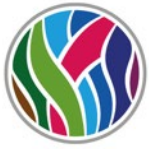

## eLife's transparent reporting form

We encourage authors to provide detailed information *within their submission* to facilitate the interpretation and replication of experiments. Authors can upload supporting documentation to indicate the use of appropriate reporting guidelines for health-related research (see [EQUATOR Network](#)), life science research (see the [BioSharing Information Resource](#)), or the [ARRIVE guidelines](#) for reporting work involving animal research. Where applicable, authors should refer to any relevant reporting standards documents in this form.

If you have any questions, please consult our Journal Policies and/or contact us: [editorial@elifesciences.org](mailto:editorial@elifesciences.org).

### Sample-size estimation

- You should state whether an appropriate sample size was computed when the study was being designed
- You should state the statistical method of sample size computation and any required assumptions
- If no explicit power analysis was used, you should describe how you decided what sample (replicate) size (number) to use

Please outline where this information can be found within the submission (e.g., sections or figure legends), or explain why this information doesn't apply to your submission:

This information is stated in Materials and Methods (in RNA Whole Mount in situ Hybridization, Immunocytochemistry and EdU pulse labeling, Perturbation Experiments with MO Injection and CRISPR Cas9 subsections) and in Figure legends 1 and 6.

### Replicates

- You should report how often each experiment was performed
- You should include a definition of biological versus technical replication
- The data obtained should be provided and sufficient information should be provided to indicate the number of independent biological and/or technical replicates
- If you encountered any outliers, you should describe how these were handled
- Criteria for exclusion/inclusion of data should be clearly stated
- High-throughput sequence data should be uploaded before submission, with a private link for reviewers provided (these are available from both GEO and ArrayExpress)

Please outline where this information can be found within the submission (e.g., sections or figure legends), or explain why this information doesn't apply to your submission:

Experiments were performed in at least three biological replicates. For qPCR experiments, technical and biological replicates are explained in the Material and Methods (Adult tissues RNA extraction and qPCR sub-paragraph). For single cell RNAseq we sequenced one batch of cells each for 48hpf, 72hpf, gcm MO and gcm control MO. Information on scRNAseq data is also described in Figure Legends 1,2, and 6. Transcriptome data are available and information for download is presented in the Materials and Methods (Single cell RNA sequencing sub-paragraph).



### Statistical reporting

- Statistical analysis methods should be described and justified
- Raw data should be presented in figures whenever informative to do so (typically when N per group is less than 10)
- For each experiment, you should identify the statistical tests used, exact values of N, definitions of center, methods of multiple test correction, and dispersion and precision measures (e.g., mean, median, SD, SEM, confidence intervals; and, for the major substantive results, a measure of effect size (e.g., Pearson's r, Cohen's d)
- Report exact p-values wherever possible alongside the summary statistics and 95% confidence intervals. These should be reported for all key questions and not only when the p-value is less than 0.05.

Please outline where this information can be found within the submission (e.g., sections or figure legends), or explain why this information doesn't apply to your submission:

For the scRNAseq analyses, statistical analysis is described in Materials and Methods section and legends of Figures 1 and 6. Figure 6 legend describes the statistical methods used for graphs in Figure 6 B, E and H (test used, p value, mean, 95% confidence intervals); N numbers are given in the main figure.

(For large datasets, or papers with a very large number of statistical tests, you may upload a single table file with tests, Ns, etc., with reference to sections in the manuscript.)

### Group allocation

- Indicate how samples were allocated into experimental groups (in the case of clinical studies, please specify allocation to treatment method); if randomization was used, please also state if restricted randomization was applied
- Indicate if masking was used during group allocation, data collection and/or data analysis

Please outline where this information can be found within the submission (e.g., sections or figure legends), or explain why this information doesn't apply to your submission:

Sea urchin embryos were collected from fertilized eggs of 3 different female sea urchins and 3 different male sea urchins. The sex of the embryos/larvae is not known, and for each replicate the samples used were randomly taken from the dish within which they are cultured.

### Additional data files ("source data")

- We encourage you to upload relevant additional data files, such as numerical data that are represented as a graph in a figure, or as a summary table
- Where provided, these should be in the most useful format, and they can be uploaded as "Source data" files linked to a main figure or table
- Include model definition files including the full list of parameters used
- Include code used for data analysis (e.g., R, MatLab)
- Avoid stating that data files are "available upon request"

Please indicate the figures or tables for which source data files have been provided:

All data are provided within the manuscript and we added Source File for Figure 6 and for Figure Supplement 5.
