# Supplementary material for: Regulation of dynamic pigment cell states at single-cell resolution
Source: eLife. 2020 Aug 19;9:e60388. doi: 10.7554/eLife.60388 (PMC7455242; doi:10.7554/eLife.60388)
Supplement: Figure 6—figure supplement 1—source data 1. [file elife-60388-fig6-figsupp1-data1.xlsx]

## Sheet: Fig. Supplement 5
cluster:	control MO	gcm MO
0	30	26
1	12	18
2	11	11
3	8	5
4	7	11
5	7	10
6	7	1
7	6	4
8	3	5
9	3	2
10	2	1
11	2	3
12	2	1
13	1	2
14	1	1
