# Supplementary material for: Regulation of dynamic pigment cell states at single-cell resolution
Source: eLife. 2020 Aug 19;9:e60388. doi: 10.7554/eLife.60388 (PMC7455242; doi:10.7554/eLife.60388)
Supplement: Figure 6—source data 1. [file elife-60388-fig6-data1.xlsx]

## Sheet: Fig.6 H
control MO	gcm MO	control cas9	pks cas9
36	7	36	32
35	7	35	35
44	1	44	34
36	21	36	33
31	0	31	39
35	3	35	38
38	11	38	36
20	5	20	33
21	0	28	37
28	2		40
29	11
35	0
27	4
31	0
32	0
34	0
33	2
34	4
36	5
30	0
36	6
26	19
32	5
33	5
48	0
25	0
33	3
34	3
31	3
