# Supplementary material for: Regulation of dynamic pigment cell states at single-cell resolution
Source: eLife. 2020 Aug 19;9:e60388. doi: 10.7554/eLife.60388 (PMC7455242; doi:10.7554/eLife.60388)
Supplement: Supplementary file 1. [file elife-60388-supp1.xlsx]

## Sheet: suppl table 1
cluster 12 vs cluster 13
	Row.names	p_val	avg_logFC	pct.1	pct.2	p_val_adj	keggList..spu..	ID
12 vs 13 at 48h	LOC588806	3.51559e-23	-2.68721	0.545	1	7.35533e-19	probable polyketide synthase 1	spu:588806
12 vs 13 at 72h	LOC588806	4.53727e-38	-3.08824	0.092	0.917	9.49287e-34	probable polyketide synthase 1	spu:588806
12 vs 13 at 48h	LOC592500	4.00246e-22	-2.20785	0.568	1	8.37394e-18	sulfotransferase	spu:592500
12 vs 13 at 72h	LOC592500	4.23435e-32	-2.35749	0.138	0.917	8.85911e-28	sulfotransferase	spu:592500
12 vs 13 at 48h	LOC588371	7.41412e-08	-1.28699	0.227	0.65	0.00155118	dimethylaniline monooxygenase [N-oxide-forming] 5	spu:588371
12 vs 13 at 72h	LOC588371	6.04686e-13	-1.01941	0.026	0.35	1.26512e-08	dimethylaniline monooxygenase [N-oxide-forming] 5	spu:588371
