# Supplementary material for: Regulation of dynamic pigment cell states at single-cell resolution
Source: eLife. 2020 Aug 19;9:e60388. doi: 10.7554/eLife.60388 (PMC7455242; doi:10.7554/eLife.60388)
Supplement: Supplementary file 2. — Negative values indicate genes enriched in cluster 13 compared to cluster 2. [file elife-60388-supp2.xlsx]

## Sheet: suppl table 2
cluster 48h 2 vs cluster 13
Row.names	p_val	avg_logFC	pct.1	pct.2	p_val_adj	keggList..spu..	ID	Function
LOC574836	5.21372e-58	-0.922191	0.042	0.391	1.09081e-53	structural maintenance of chromosomes protein 2	spu:574836	S-phase cohesin
LOC584095	3.18696e-48	-0.93587	0.052	0.381	6.66776e-44	DNA polymerase alpha catalytic subunit	spu:584095	S-phase
LOC373260	1.60297e-40	-0.944835	0.118	0.503	3.35373e-36	histone-binding protein N1/N2 isoform X1	spu:373260	mitosis
LOC583691	2.13249e-47	-0.952277	0.081	0.452	4.46159e-43	DNA repair protein RAD51 homolog 1	spu:583691	S-phase
LOC580943	7.09993e-42	-0.956186	0.273	0.761	1.48545e-37	structural maintenance of chromosomes protein 1A	spu:580943	cohesin, S-phase
LOC578080	8.16879e-61	-1.01174	0.036	0.376	1.70907e-56	rac GTPase-activating protein 1 isoform X1	spu:578080	mitosis
LOC576796	8.60964e-64	-1.07541	0.054	0.452	1.80131e-59	nucleolar and spindle-associated protein 1-A isoform X2	spu:576796	mitosis
LOC589199	3.79362e-70	-1.11535	0.078	0.553	7.93701e-66	centromere protein C	spu:589199	mitosis
LOC582001	8.78137e-54	-1.12564	0.1	0.533	1.83724e-49	DNA topoisomerase 2-alpha isoform X1	spu:582001	S-phase
LOC100890576	5.67982e-58	-1.13147	0.107	0.569	1.18833e-53	PCNA-associated factor	spu:100890576	S-phase
LOC593807	7.10886e-62	-1.15012	0.101	0.574	1.48732e-57	targeting protein for Xklp2 homolog isoform X1	spu:593807	spindle protein
LOC584403	1.84559e-79	-1.20276	0.055	0.518	3.86133e-75	condensin-2 complex subunit H2	spu:584403	mitosis
LOC592992	3.98746e-95	-1.31658	0.091	0.69	8.34257e-91	structural maintenance of chromosomes protein 4 isoform X1	spu:592992	mitosis
LOC584331	1.52915e-47	-1.39756	0.22	0.701	3.19928e-43	tubulin alpha-1 chain	spu:584331	mitosis
LOC100891325	1.29803e-93	-1.42033	0.054	0.563	2.71573e-89	transcription factor E2F8	spu:100891325	mitosis
LOC575965	9.43637e-72	-1.52404	0.163	0.716	1.97428e-67	cyclin-dependent kinase 1	spu:575965	mitosis
LOC584359	1.06609e-81	-1.61007	0.13	0.69	2.23047e-77	chromatin assembly factor 1 subunit A isoform X3	spu:584359	S-phase
LOC752989	6.68591e-90	-1.69431	0.103	0.675	1.39883e-85	DNA ligase 1 isoform X1	spu:752989	mitosis
LOC592172	7.8719e-102	-1.78075	0.138	0.807	1.64696e-97	centromere protein F	spu:592172	mitosis
72h cluster 2 vs cluster 13
Row.names	p_val	avg_logFC	pct.1	pct.2	p_val_adj	keggList..spu..	ID	Function
LOC589199	2.98136e-19	-1.03887	0.066	0.4	6.2376e-15	centromere protein C	spu:589199	mitosis
LOC752321	3.84181e-25	-1.04777	0.023	0.283	8.03783e-21	PCNA-interacting partner isoform X1	spu:752321	s phase
LOC578080	1.27194e-21	-1.12895	0.025	0.267	2.66116e-17	rac GTPase-activating protein 1 isoform X1	spu:578080	cytokinesis
LOC576779	3.61173e-31	-1.27599	0.049	0.45	7.55647e-27	cyclin B	spu:576779	mitosis
LOC576796	1.56439e-43	-1.38562	0.055	0.567	3.27301e-39	nucleolar and spindle-associated protein 1-A isoform X2	spu:576796	mitosis
LOC590990	3.91877e-45	-1.43309	0.017	0.367	8.19884e-41	anillin isoform X1	spu:590990	cytokinesis
LOC373241	3.75087e-36	-1.46643	0.053	0.5	7.84757e-32	KRP170	spu:373241	kinesin
LOC592992	8.37701e-46	-1.48401	0.085	0.7	1.75264e-41	structural maintenance of chromosomes protein 4 isoform X1	spu:592992	condensin subunit-mitosis
LOC580574	1.63101e-38	-1.50107	0.079	0.617	3.41241e-34	cyclin-dependent kinase inhibitor 3	spu:580574	G1 to block mitotic progression
LOC575965	8.99831e-29	-1.56197	0.166	0.733	1.88263e-24	cyclin-dependent kinase 1	spu:575965	mitosis
LOC582001	2.52271e-36	-1.57385	0.094	0.633	5.27801e-32	DNA topoisomerase 2-alpha isoform X1	spu:582001	mitosis
LOC592172	2.68155e-60	-2.30285	0.128	0.9	5.61033e-56	centromere protein F	spu:592172	mitotis
