# Supplementary material for: Regulation of dynamic pigment cell states at single-cell resolution
Source: eLife. 2020 Aug 19;9:e60388. doi: 10.7554/eLife.60388 (PMC7455242; doi:10.7554/eLife.60388)
Supplement: Supplementary file 3. [file elife-60388-supp3.xlsx]

## Sheet: FISHprimers-supplementary file3
Gene name	SPU_NUMBER	Fw	Rv
Sp-gcm	SPU_006462	CGATAAGAAATGCCCAAGGA	CGAGGGTGCTTAGTCTCCTG
Sp-pks1	SPU_002895	GGGCAGCTCAGTCTTGAAAC	CTCCGACCTCTAGCAACCTG
Sp-fmo3	SPU_017374	CGGATTCCTACGCCAACAAG	TAGGGGATGGGAGGGATGAA
Sp-fmo5-1	SPU_012348	AGGAACCATGGTCCTCAGTG	GGTCAGCACAGAGAGGATGA
Sp-fmo2-2	SPU_014947	GTGTAAAGACGGTGGCGATC	TGTCTGCGAACATGACCTCT
Sp-fmo2	SPU_002963	TCACGGATCTCCTCATGTC	AGAACGCGGTGTGTAAAACCA
Sp-fmo5	SPU_009114	CTACAACGACGAGCTTGCTC	TTTAGCTCAACACTCCGGGT
Sp-fmo2-3	SPU_022765	AGGGCAAGTGACATCCAAGA	TTGAGCCTGTAGCCTGT
Sp-fmo1	SPU_017639	GTGTGCAACGGTCATTATGC	CCTGAGCGGTGAAGTGAGT
Sp-gluR6	SPU_028455	CAAGAGTTCTGGAGCGAACC	ACCACCAGAAACCACTGAGG
Sp-sult1c2	SPU_006187	GACGCCACATTTTTCAGGAT	CCGCTTCTTTGAAGACCAAC
Sp-abcg11	SPU_020849	GGAATCCAGCGAATTCGTAA	GTAGGTGTCGGGACAGTCGT
Sp-oprk	SPU_000719	GTACGCTGACCTTGGGACAT	ACTTTTTGCTTCTCCCAGCA
Sp-mif5	SPU_020036	TTCGCCTCCATTTTTAGGTG	CCCTGGACAGCAAATTACCA
