# Supplementary material for: Regulation of dynamic pigment cell states at single-cell resolution
Source: eLife. 2020 Aug 19;9:e60388. doi: 10.7554/eLife.60388 (PMC7455242; doi:10.7554/eLife.60388)
Supplement: Supplementary file 4. [file elife-60388-supp4.xlsx]

## Sheet: qPCR primers-SupplFile4
Gene name	SPU_NUMBER	Fw	Rv
Sp-gcm	SPU_006462	CACAGACACGAGAGGCCTAA	ACGGATATGTGAGCGGAGAG
Sp-pks1	SPU_002895	AACCCCGACACCATTGATCT	CCCGAATCGTTAGGTCCGTA
Sp-fmo3	SPU_017374	TTCATCCCTCCCATCCCCTA	CTGCCAGACGTTCATGATGG
Sp-fmo5-1	SPU_012348	CAAAGAGAAGCACCACACCC	TCTTGGTAAGGCAGGGGAAG
Sp-fmo2-2	SPU_014947	TACATTTTCCCACCTCGCCT	TGTCTGCGAACATGACCTCT
Sp-fmo2	SPU_002963	CCCGTTTACCAGAGAACCCT	CTCGCCAAATCGCCCTAAAA
Sp-fmo5	SPU_009114	GCCATTGGTTACATCCGGTC	TCGTCGTTGTAGGTAGTCGG
Sp-fmo2-3	SPU_022765	ACCCCACCCTATCCTTTGTG	CTGATCACGGTATGCGGTTG
Sp-gluR6	SPU_028455	GAAAGCAGACATGGCCGTAG	CAGGACACAACCCCATACCT
Sp-sult1c2	SPU_006187	ATTCCTGCACAGCTCTACGT	TTGGCCACGTGATGAGGTAT
Sp-abcg11	SPU_020849	ATTTGCACCATCCACCAACC	AGTAATCCGCGGGTGAGTAG
Sp-oprk	SPU_000719	TCTTCAGAAGGCCCCGATAC	TTTCCCAGCAAAAGCCCATC
Sp-mif5	SPU_020036	CGTTCTCATGCGACCACAAT	CCCCTGGACAGCAAATTACC
Sp-fmo5-3	SPU_022596	CTCTCAACGGCATACCATCC	GGTCCGACCAGACGATACTG
Sp-fmo3-1	SPU_022597	TCCAACCGTTAGGTTCCACT	GGTATGCCGTTGAGAGGAGA
Sp-fmo5-2	SPU_017252	GCTCCAAGCTAGATGGGCTA	CCGTGGAGAGGAGACGTAAC
Sp-fmo5	SPU_009114	GGAGTGGTCTTCAACGGTTC	CGTGACCGGATGTAACCAAT
Sp-fmo5-4	SPU_024261	CCACTTCAATACGACGGTCA	GGAATTTTGCCGGATGAATA
Sp-fmo2-3	SPU_022765	CTACGAGCGTACGTCCCACT	GGCGGAAGAGACTTCTTCATT
Sp-fmo6	SPU_007044	ATCTTCCCCAGCCTCTGTTT	CCCTTGCTTCATCTTCTTGC
Sp-fmo2-5	SPU_023681	GTCACGTGGGAGGTCAAAGT	GTGAAGGATTTGACCGGAGA
Sp-fmo1	SPU_017639	CTGATCGTGTCGGAGGAACT	GCCATGATCTCCTTCGGTAG
Sp-fmo5-6	SPU_024227	CATGTCTCGAGGAAGGGCTA	CCTTGTTCACGTTTGTGACG
Sp-fmo2-4	SPU_025958	CCTCGATGTGGTGATGTACG	CTGGACAAAACCGATGAAGG
